# Supplementary material for: Lipidomic Analysis of Plastidial Octanoyltransferase Mutants of Arabidopsis thaliana
Source: PubMed Central journal article supplement (PMC6835903; doi:10.3390/metabo9100209), 2019-09-29
Supplement: metabolites-09-00209-s001.pdf [file metabolites-09-00209-s001.pdf]

## Supplementary Material

Table S1. PCR oligonucleotides used in this study.

| <b>Primer</b>         | <b>Sequence (5' - 3')</b>   |
|-----------------------|-----------------------------|
| LBb1.3                | ATTTTGCCGATTTTCGGAAC        |
| AtLIP2p1-RP           | ACTACCAAAGAGGCCCAAAG        |
| AtLIP2p2-RP           | AAGATCCATTTTGTGATTCCG       |
| AtLIP2p1-LP           | TGAGGCATTTTAACGAACACC       |
| AtLIP2p2-LP           | TCAAAGGTGGCTCAGAAGTG        |
| AtLIP2p1-transcript-F | GGTCATGGCAGAAGAGCATTGTCTG   |
| AtLIP2p1-transcript-R | CACCTTCCTTTTAGCACTCCAATCG   |
| AtLIP2p2-transcript-F | GTTGCAACAAGCTCTGTTACG       |
| AtLIP2p2-transcript-R | TTGTTGCCAACCCTCAACTCCA      |
| At18S-F               | GGTAGGCGATTGGCTAACATTGTCTGC |
| At18S-R               | GAGACACCAACAGTCTTTCCTCTGCG  |

Figure S1

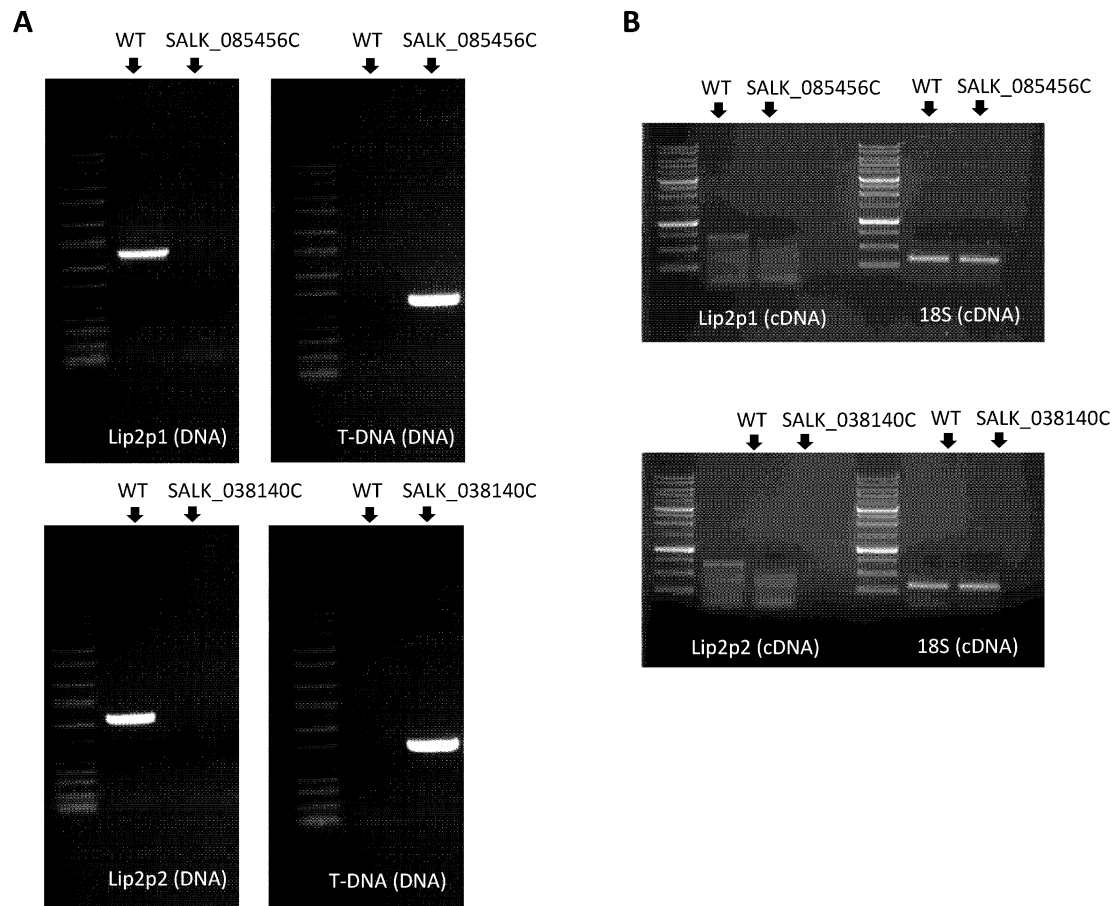

Figure S1. (A) Left panel, PCR with genomic DNA (gDNA) shows presence of intact LIP2p1 or LIP2p2 gene in the WT and absence of such genes in the *lip2p1* (SALK\_085456C) and *lip2p2* (SALK\_038140C) mutants. Right panel, PCR with gDNA shows presence of the T-DNA in the mutants and its absence in the WT. (B) RT-PCR shows absence of LIP2p1 and LIP2p2 transcripts in both mutants in comparison with control signals from the constitutively expressed 18S ribosomal gene.
